# Supplementary material for: Bioinformatic Characterization and Molecular Evolution of the Lucina pectinata Hemoglobins
Source: MDPI journal article supplement (doi:10.3390/genes13112041), 2022-11-05
Supplement: s1 [file s1]

**Supplementary Table S1** List of organism and globins used for MSA and abbreviations used for analysis.

| Organism                                                                                           | Class      | Description                                 | Similarity % | E-value   | GenBank Accession number |
|----------------------------------------------------------------------------------------------------|------------|---------------------------------------------|--------------|-----------|--------------------------|
| <b>Summary of BLAST search results obtained with HbI amino acid sequence AAG01380.1 as query</b>   |            |                                             |              |           |                          |
| <i>Lucina pectinata</i>                                                                            | Bivalvia   | Hemoglobin I                                | 100          | 9.0E-100  | P41260.4                 |
| <i>Lucina pectinata</i>                                                                            | Bivalvia   | Hemoglobin II                               | 32           | 1.00E-18  | AAO89499.1               |
| <i>Lucina pectinata</i>                                                                            | Bivalvia   | Hemoglobin III                              | 33           | 4.00E-16  | ABS87592.1               |
| <i>Calypptogena nautilei</i>                                                                       | Bivalvia   | Hemoglobin III                              | 29           | 6.00E-12  | BAD34605.1               |
| <i>Aplysia limacina</i>                                                                            | Gastropoda | Myoglobin                                   | 29           | 6.00E-10  | 1MBA_A                   |
| <i>Yoldia eightsi</i>                                                                              | Bivalvia   | Hemoglobin I                                | 32           | 4.00E-10  | Q8T7J9.1                 |
| <i>Calypptogena soyoae</i>                                                                         | Bivalvia   | Hemoglobin II                               | 27           | 2.00E-10  | BAD34604.1               |
| <i>Calypptogena tsubasa</i>                                                                        | Bivalvia   | Hemoglobin II                               | 29           | 1.00E-10  | BAD35021.1               |
| <i>Calypptogena kaikoi</i>                                                                         | Bivalvia   | Hemoglobin II                               | 28           | 1.00E-10  | BAD34602.1               |
| <i>Aplysia kurodai</i>                                                                             | Gastropoda | Myoglobin                                   | 26           | 2.00E-09  | P02211.4                 |
| <i>Scapharca inaequivalvis</i>                                                                     | Bivalvia   | Hemoglobin IIA                              | 30           | 3.00E-07  | P14821.2                 |
| <i>Scapharca kagoshimensis</i>                                                                     | Bivalvia   | Hemoglobin (HbIIA)                          | 30           | 3.00E-07  | ACN90947.1               |
| <i>Calypptogena kaikoi</i>                                                                         | Bivalvia   | Hemoglobin I                                | 29           | 1.00E-07  | BAD34601.1               |
| <i>Calypptogena soyoae</i>                                                                         | Bivalvia   | Hemoglobin I                                | 29           | 3.00E-06  | BAD34603.1               |
| <i>Tegillarca granosa</i>                                                                          | Bivalvia   | Hemoglobin (HbIIA)                          | 32           | 2.00E-06  | ADZ52803.1               |
| <b>Summary of BLAST search results obtained with HbII amino acid sequence AAO89499.1 as query</b>  |            |                                             |              |           |                          |
| <i>Lucina pectinata</i>                                                                            | Bivalvia   | Hemoglobin II                               | 100          | 1.00E-112 | AAO89499.1               |
| <i>Lucina pectinata</i>                                                                            | Bivalvia   | Hemoglobin III                              | 65           | 7.00E-72  | ABS87592.1               |
| <i>Lucina pectinata</i>                                                                            | Bivalvia   | Hemoglobin I                                | 32           | 1.00E-18  | P41260.4                 |
| <i>Scapharca inaequivalvis</i>                                                                     | Bivalvia   | Hemoglobin IIB                              | 31           | 6.00E-07  | AAB51308.1               |
| <i>Barbatia virescens</i>                                                                          | Bivalvia   | Hemoglobin II                               | 28           | 2.00E-10  | BAA09587.1               |
| <i>Tegillarca granosa</i>                                                                          | Bivalvia   | Hemoglobin (HbI)                            | 32           | 1.00E-10  | AEL88623.1               |
| <i>Scapharca broughtonii</i>                                                                       | Bivalvia   | Hemoglobin                                  | 30           | 8.00E-09  | P02212.1                 |
| <i>Aplysia juliana</i>                                                                             | Gastropoda | Myoglobin                                   | 25           | 7.00E-09  | BAA19794.1               |
| <i>Calypptogena nautilei</i>                                                                       | Bivalvia   | Hemoglobin IV                               | 31           | 3.00E-09  | BAD34606.1               |
| <i>Scapharca inaequivalvis</i>                                                                     | Bivalvia   | Homodimeric hemoglobin                      | 30           | 3.00E-08  | CAA50510.1               |
| <i>Scapharca kagoshimensis</i>                                                                     | Bivalvia   | hemoglobin(HbI)                             | 30           | 2.00E-08  | ACN90946.1               |
| <i>Anadara trapezia</i>                                                                            | Bivalvia   | Globin                                      | 33           | 1.00E-08  | P25165.2                 |
| <i>Calypptogena tsubasa</i>                                                                        | Bivalvia   | Hemoglobin I                                | 27           | 8.00E-07  | BAD35020.1               |
| <i>Barbatia lima</i>                                                                               | Bivalvia   | $\alpha$ chain of the tetrameric hemoglobin | 27           | 2.00E-07  | BAA09966.1               |
| <i>Barbatia virescens</i>                                                                          | Bivalvia   | Hemoglobin I                                | 26           | 1.00E-07  | AAB24577.2               |
| <i>Anadara trapezia</i>                                                                            | Bivalvia   | Beta globin                                 | 30           | 3.00E-06  | P04251.3                 |
| <i>Barbatia lima</i>                                                                               | Bivalvia   | Homodimeric hemoglobin $\delta$ chain       | 26           | 1.00E-05  | BAA09965.1               |
| <i>Barbatia lima</i>                                                                               | Bivalvia   | $\beta$ chain of the tetrameric hemoglobin  | 24           | 4.00E-04  | BAA09967.1               |
| <b>Summary of BLAST search results obtained with HbIII amino acid sequence ABS87592.1 as query</b> |            |                                             |              |           |                          |
| <i>Lucina pectinata</i>                                                                            | Bivalvia   | Hemoglobin III                              | 100          | 5.00E-114 | ABS87592.1               |
| <i>Lucina pectinata</i>                                                                            | Bivalvia   | Hemoglobin II                               | 65           | 7.00E-72  | AAO89499.1               |
| <i>Lucina pectinata</i>                                                                            | Bivalvia   | Hemoglobin I                                | 33           | 4.00E-16  | P41260.4                 |
| <i>Spisula solidissima</i>                                                                         | Bivalvia   | Nerve hemoglobin                            | 30           | 9.00E-26  | CAJ31107.1               |
| <i>Scapharca kagoshimensis</i>                                                                     | Bivalvia   | Hemoglobin (HbIIB)                          | 28           | 5.00E-08  | ACN90948.1               |

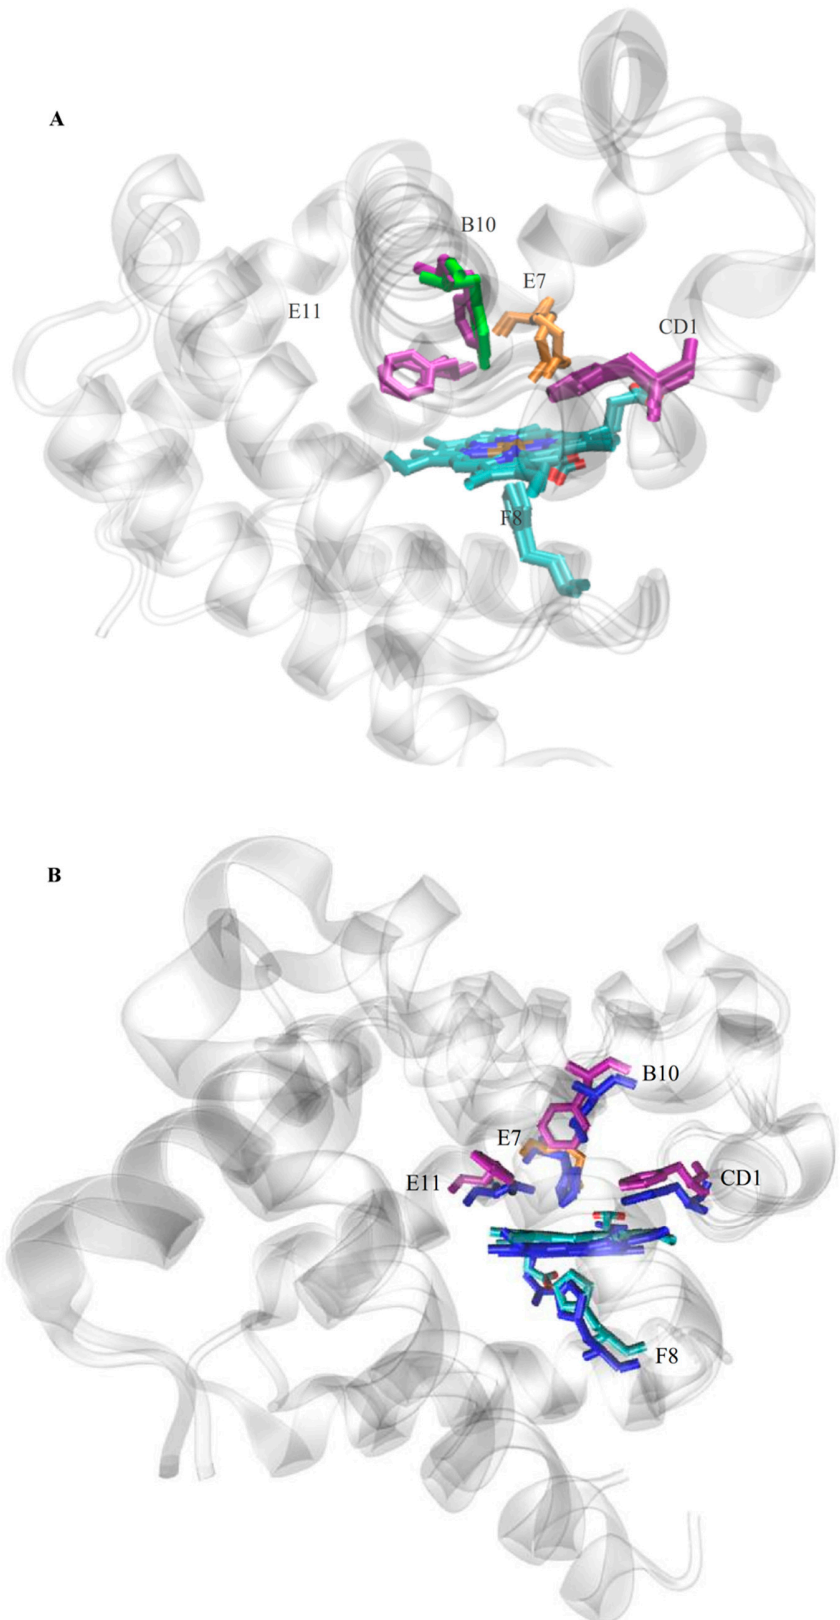

**Supplementary Figure S1.** A) Structural alignment of HbI<sub>Lp</sub> protein structure (PDB 1FLP) and HbII<sub>Lp</sub> (PDB 2OLP) showing their amino acid distribution in the heme pocket. Alignment was done using the STAMP algorithm as implemented in MultiSeq in VMD. The only difference between the two heme pockets is the amino acid in

position B10, a phenylalanine for HbI<sub>Lp</sub> and a tyrosine for HbII<sub>Lp</sub>. Both hemoglobins have a phenylalanine at positions CD1 and E11, a glutamine at position E7 and a histidine at position F8. HbII<sub>Lp</sub> and HbIII<sub>Lp</sub> have the same heme pocket amino acid distribution. B) Structural alignment of HbI<sub>Lp</sub> protein structure (PDB 1FLP) and Sperm Whale Myoglobin (SWM) (PDB 1A6M) showing their amino acid distribution in the heme pocket. Amino acid residues of heme pocket of SWM are colored in blue. For SWM there is a leucine at position B10, a histidine at position E7 and a valine in position E11.

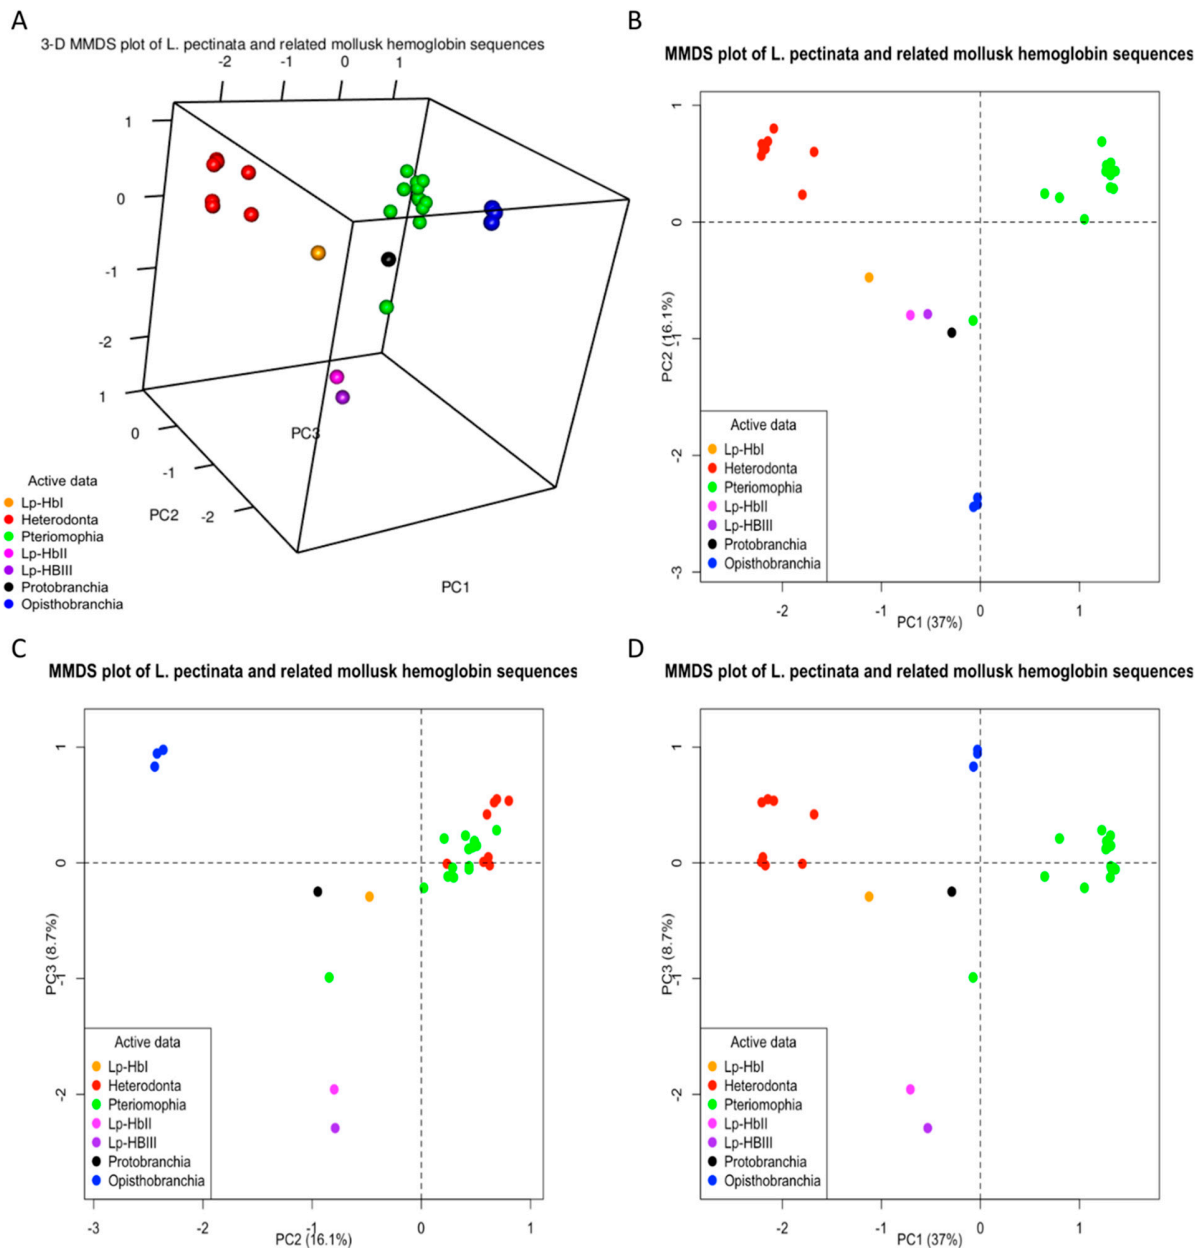

**Supplementary Figure S2. A) 3D representation of the mollusk globins sequence space.** A typical multiple sequence alignment of 32 homologous mollusk globins was analyzed by MDS, with distances based on the JTT distance matrix. The 3D space is defined by the first three components of the MDS analysis. HbI<sub>Lp</sub> is colored in gold, HbII<sub>Lp</sub> is colored in pink and HbIII<sub>Lp</sub> is colored in purple. The rest of the sequences are color coded according to mollusk sub-families they belong to: colored in red are Heterodonta subclass, in green are the Pteriomophia subclass, in blue are the Opisthobranchia subclass, and in black the Bivalve, Y. eightsi, member of the Protobranchia subclass. **B) The 2D sequence space of mollusk globin formed by PC1 and PC2.** **C) The 2D sequence space of mollusk globin formed by PC3 and PC2.** **D) The 2D sequence space of mollusk globin formed by PC1 and PC3.** We show the 3-D projection of the first three PC. It is highly informative about the evolution and drift of these proteins. The 2D projections for pairs of these three PC are also shown in Supplementary Figure 2 as B, C and D. In this analysis we observed, as expected, that these globins are also clustered according to their subfamilies. The 2D

sequence space of PC1 and PC2, Supplementary Figure 2B, resembles the unrooted phylogenetic tree previously shown. However, the 3D sequence space clearly shows how HbII<sub>Lp</sub> and HbIII<sub>Lp</sub> are close to each other and separated from the other members of the Heterodonta subfamily. This can also be seen in the other two 2D sequence space shown in Supplementary Figure 2C and Supplementary Figure 2D. This data shows that HbII<sub>Lp</sub> and HbIII<sub>Lp</sub> have drifted evolutionarily in the sequence space.
